# Supplementary material for: Temporal Changes in Glutaredoxin 1 and Protein S-Glutathionylation in Allergic Airway Inflammation
Source: PLoS One. 2015 Apr 13;10(4):e0122986. doi: 10.1371/journal.pone.0122986 (PMC4395207; doi:10.1371/journal.pone.0122986)
Supplement: S8 Table — Correlations were assessed by Pearson’s correlation coefficient. (XLSX) [file pone.0122986.s017.xlsx]

## Sheet: Sheet1
BAL Glrx1	control	OVA 6 h	OVA 24 h	OVA 48 h	OVA 72 h	OVA 8 day	all
IL-4	p=0.88	p=0.94	p=0.28	p=0.85	p=0.50	p=0.70	p<0.01
	r=-0.10	r=0.06	r=0.65	r=-0.14	r=-0.45	r=0.26	r=0.65
IL-13	p>0.99	p=0.86	p=0.48	p=0.48	p=0.61	p>0.99	p=0.01
	r=ND	r=-0.12	r=0.46	r=-0.46	r=-0.34	r=ND	r=0.46
TNF-α	p=0.35	p=0.92	p=0.50	p=0.86	p=0.15	p=0.83	p<0.01
	r=-0.58	r=0.07	r=0.44	r=-0.12	r=-0.77	r=0.15	r=0.68
IL-6	p>0.99	p=0.78	p=0.33	p=0.91	p=0.88	p>0.99	p<0.01
	r=ND	r=0.20	r=0.59	r=-0.08	r=0.11	r=ND	r=0.62
KC	p=0.63	p=0.33	p=0.23	p=0.89	p=0.13	p-0.91	p<0.01
	r=-0.33	r=-0.59	r=-0.69	r=-0.09	r=0.79	r=0.08	r=0.61
eotaxin-1	p=0.01	p=0.58	p=0.36	p=0.74	p=0.54	p=0.31	p<0.01
	r=0.96	r=0.37	r=0.57	r=-0.23	r=-0.41	r=0.62	r=0.52
RANTES	p=0.55	p=0.88	p=0.25	p=0.65	p=0.16	p=0.90	p<0.01
	r=-0.40	r=-0.13	r=0.67	r=-0.31	r=0.76	r=0.09	r=0.57
TGF-β１	p=0.92	p=0.88	p=0.11	p=0.81	p=0.84	p=0.69	p=0.07
	r=0.07	r=-0.11	r=0.81	r=-0.17	r=-0.14	r=-0.28	r=0.33
Lung Glrx1	control	OVA 6 h	OVA 24 h	OVA 48 h	OVA 72 h	OVA 8 day	all
IL-4	p=0.94	p=0.37	p=0.77	p=0.87	p=0.33	p=0.48	p=0.78
	r=-0.06	r=0.56	r=-0.20	r=0.12	r=0.60	r=-0.47	r=0.05
IL-13	p>0.99	p=0.71	p=0.28	p=0.82	p=0.27	p>0.99	p=0.42
	r=ND	r=0.26	r=-0.65	r=0.16	r=0.65	r=ND	r=0.15
TNF-α	p=0.38	p=0.76	p=0.55	p=0.69	p=0.88	p=0.44	p=0.59
	r=-0.55	r=-0.21	r=-0.40	r=0.27	r=0.11	r=-0.50	r=0.10
IL-6	p>0.99	p=0.46	p=0.66	p=0.80	p=0.08	p>0.99	p<0.01
	r=ND	r=0.48	r=-0.30	r=0.18	r=0.84	r=ND	r=0.04
KC	p=0.45	p=0.01	p=0.97	p=0.21	p=0.80	p=0.97	p=0.70
	r=-0.49	r=-0.98	r=-0.03	r=0.71	r=0.18	r=-0.20	r=0.07
eotaxin-1	p=0.05	p=0.58	p=0.36	p=0.74	p=0.54	p=0.31	p<0.01
	r=0.82	r=-0.04	r=-0.19	r=0.13	r=0.16	r=0.68	r=0.25
RANTES	p=0.48	p=0.75	p=0.69	p=0.80	p=0.72	p=0.77	p=0.53
	r=-0.47	r=0.22	r=-0.27	r=0.18	r=0.25	r=-0.21	r=0.12
TGF-β１	p=0.76	p=0.41	p=0.48	p=0.72	p=0.49	p=0.28	p=0.02
	r=0.21	r=0.52	r=-0.46	r=-0.25	r=0.45	r=-0.64	r=0.43
ND: not detectable
